# Supplementary material
Source: PubMed Central journal article supplement (PMC8717797)
Supplement: ejhpharm-2019-002028supp001.pdf [file ejhpharm-2019-002028supp001.pdf]

Online supplementary table 1: EAHP Survey Questions and overall results

| Section 1: Introductory Statements and Governance                                                                                                                        |                                |
|--------------------------------------------------------------------------------------------------------------------------------------------------------------------------|--------------------------------|
| S1.1 The pharmacists in our hospital work routinely as part of a multidisciplinary team.                                                                                 | 48% of responses were positive |
| S1.3 Our hospital is able to prioritise hospital pharmacy activities according to the agreed criteria.                                                                   | 65% of responses were positive |
| S1.5 The pharmacists in our hospital are engaged in the supervision of all steps of all medicine use processes.                                                          | 70% of responses were positive |
| S1.5.2 Do you have an approved human resource plan in place to address this?                                                                                             | 25% of responses were positive |
| S1.6 At least one pharmacist from our team is a full member of the Drug & Therapeutics Committee or equivalent.                                                          | 89% of responses were positive |
| S1.6.2 The pharmacists in our hospital take the lead or have an active role in coordinating the activities of the Drugs & Therapeutics Committees or equivalent.         | 90% of responses were positive |
| S1.7 The pharmacists in our hospital are involved in the design, specification of parameters and evaluation of ICT used within medicines processes.                      | 63% of responses were positive |
| Section 3: Production and Compounding                                                                                                                                    |                                |
| S3.1 The pharmacists in our hospital check if a suitable product is commercially available before we manufacture or prepare a medicine.                                  | 90% of responses were positive |
| S3.2 When medicines require manufacture or compounding, we either produce them in our hospital pharmacy or we outsource to an approved provider.                         | 88% of responses were positive |
| S3.3 The pharmacists in our hospital undertake a risk assessment to determine the best practice quality requirements before making a pharmacy preparation.               | 81% of responses were positive |
| S3.4 The pharmacy in our hospital has an appropriate system in place for the quality assurance of pharmacy prepared and compounded medicines.                            | 77% of responses were positive |
| S3.4.2 The pharmacy in our hospital has an appropriate system in place for the traceability of pharmacy prepared and compound medicines.                                 | 82% of responses were positive |
| S3.5 Our hospital has appropriate systems in place for the preparation and supply of hazardous medicines.                                                                | 71% of responses were positive |
| S3.5.2 Our hospital has appropriate systems in place to minimise the risk of exposing hospital personnel, patients and the environment to harm from hazardous medicines. | 79% of responses were positive |
| S3.6 Our hospital has written procedures that ensure staff are appropriately trained to reconstitute or mix medicines in a patient care area.                            | 72% of responses were positive |
| S3.6.2 Were pharmacists involved in approving these procedures?                                                                                                          | 82% of responses were positive |

| Section 4: Clinical Pharmacy Services                                                                                                                                                      |                                |
|--------------------------------------------------------------------------------------------------------------------------------------------------------------------------------------------|--------------------------------|
| S4.1 The pharmacists in our hospital play a full part in shared decision-making on medicines, including advising, implementing and monitoring medication changes.                          | 59% of responses were positive |
| S4.2 All prescriptions in our hospital are reviewed and validated as soon as possible by a pharmacist.                                                                                     | 55% of responses were positive |
| S4.2.2 Does this review and validation by a pharmacist take place prior to the administration of medicines?                                                                                | 88% of responses were positive |
| S4.3 The pharmacists in our hospital have access to the patients' health record.                                                                                                           | 66% of responses were positive |
| S4.3.2 The pharmacists in our hospital document their clinical interventions into the patients' health record.                                                                             | 66% of responses were positive |
| S4.3.4 We analyse these clinical pharmacy interventions to inform quality improvement plans.                                                                                               | 80% of responses were positive |
| S4.4 The pharmacists in our hospital enter all medicines used onto the patient's medical record on admission.                                                                              | 30% of responses were positive |
| S4.4.2 The pharmacists in our hospital reconcile medicines on admission                                                                                                                    | 41% of responses were positive |
| S4.4.4 When reconciling medicines, the pharmacists in our hospital assess the appropriateness of all patients' medicines, including herbal and dietary supplements.                        | 44% of responses were positive |
| S4.5 The pharmacists in our hospital contribute to the transfer of information about medicines when patients move between and within healthcare settings.                                  | 41% of responses were positive |
| S4.6 The pharmacists in our hospital ensure patients and carers are offered information about their medicines in terms they can understand.                                                | 57% of responses were positive |
| S4.6.3 Have the pharmacists in your hospital received appropriate education and support to help them explain the risks and benefits of medicines, in terms patients/carers can understand? | 70% of responses were positive |
| S4.7 The patients in our hospital are informed when medicines are used outside of their marketing authorisation.                                                                           | 62% of responses were positive |
| S4.7.2 Do hospital pharmacists do this?                                                                                                                                                    | 39% of responses were positive |
| S4.8 Do you have an agreed strategic plan for the development of clinical pharmacy services in your hospital?                                                                              | 47% of responses were positive |
