# Supplementary material
Source: PubMed Central journal article supplement (PMC8717797)

Online supplementary figure 1: Percentage of respondents who gave a positive response to the statement “The pharmacists in our hospital enter all medicines used onto the patient’s medical record on admission.”

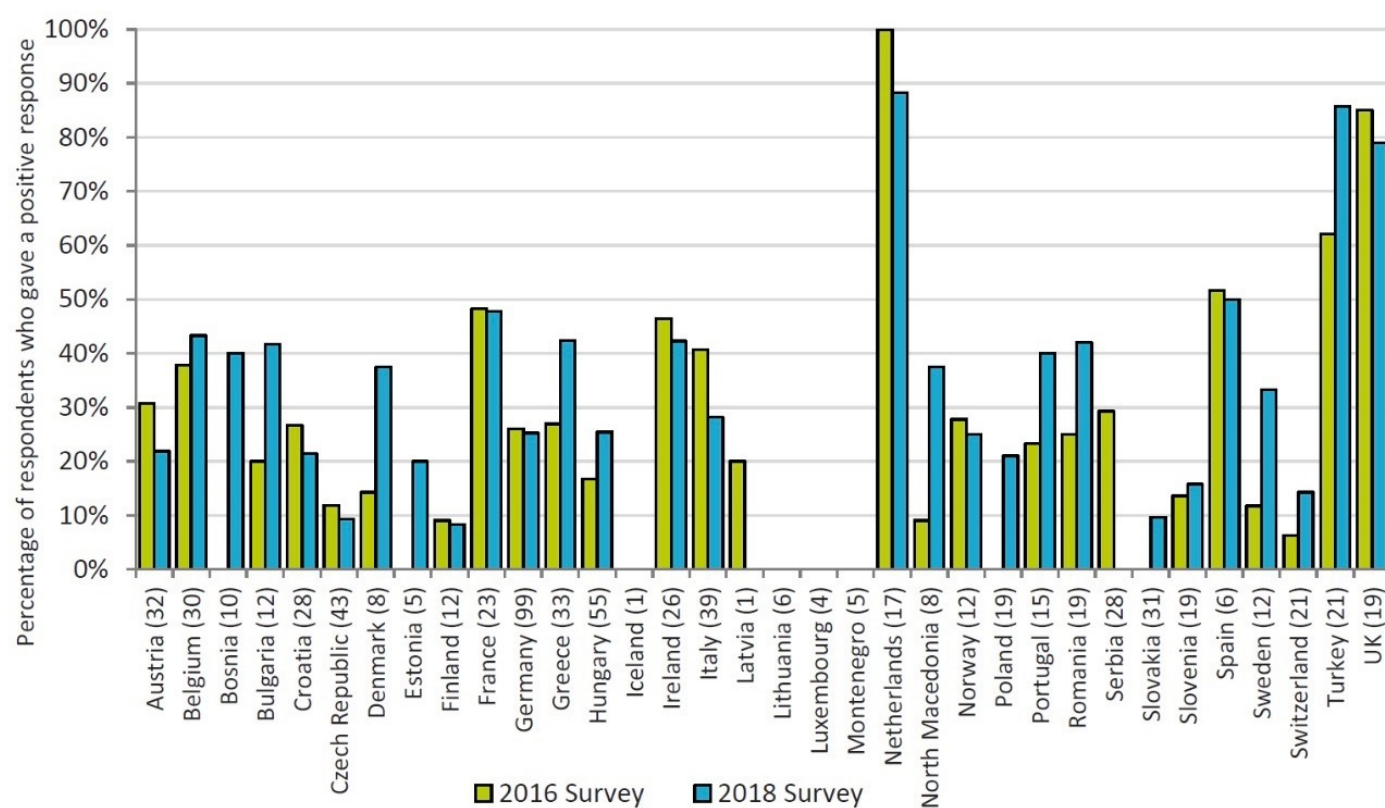

Supplement: ejhpharm-2019-002028supp003.pdf [file ejhpharm-2019-002028supp003.pdf]
