# Supplementary material
Source: PubMed Central journal article supplement (PMC8717797)

Online supplementary figure 2: Percentage of respondents who gave a positive response to the statement “The pharmacists in our hospital contribute to the transfer of information about medicines when patients move between and within healthcare settings”.

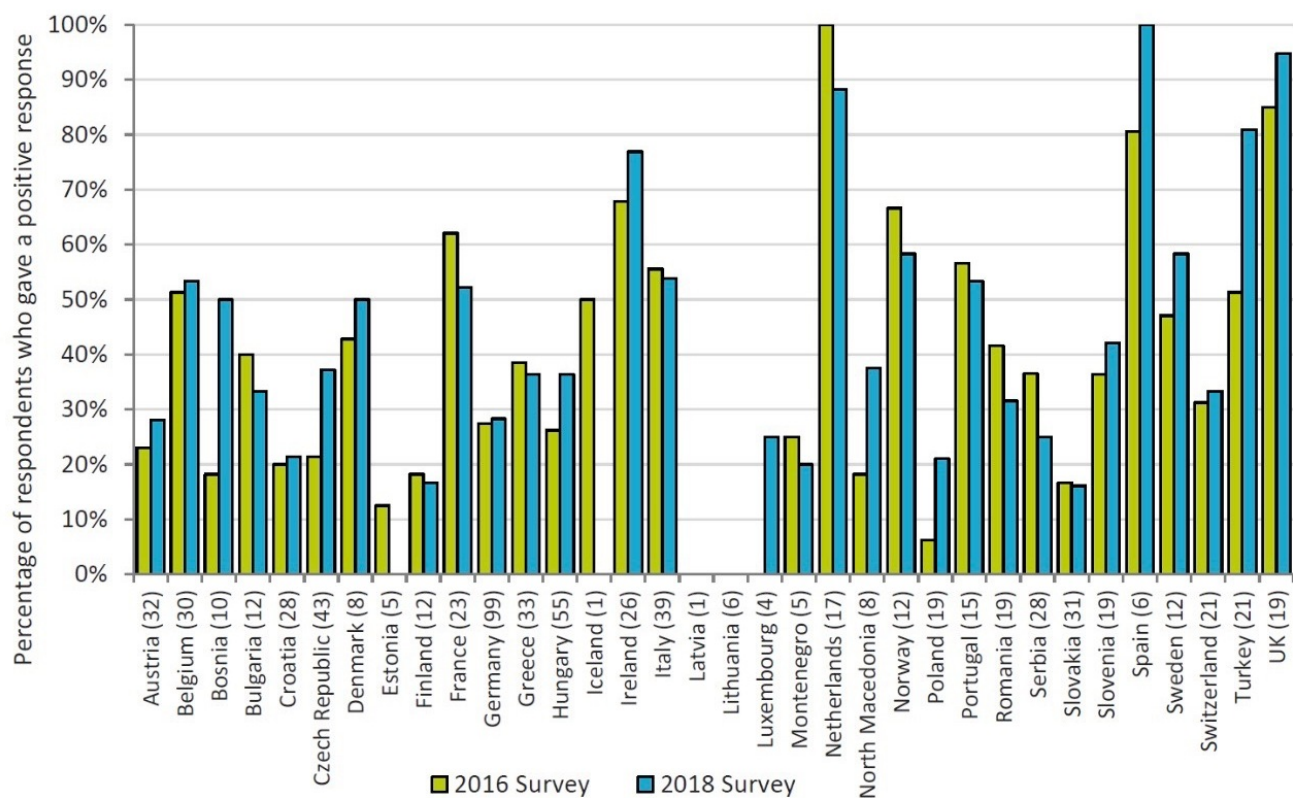

Supplement: ejhpharm-2019-002028supp004.pdf [file ejhpharm-2019-002028supp004.pdf]
