# Supplementary material
Source: PubMed Central journal article supplement (PMC8717797)

Online supplementary figure 3: Percentage of respondents who gave a positive response to the statement “Do you have an agreed strategic plan for the development of clinical pharmacy services in your hospital?”

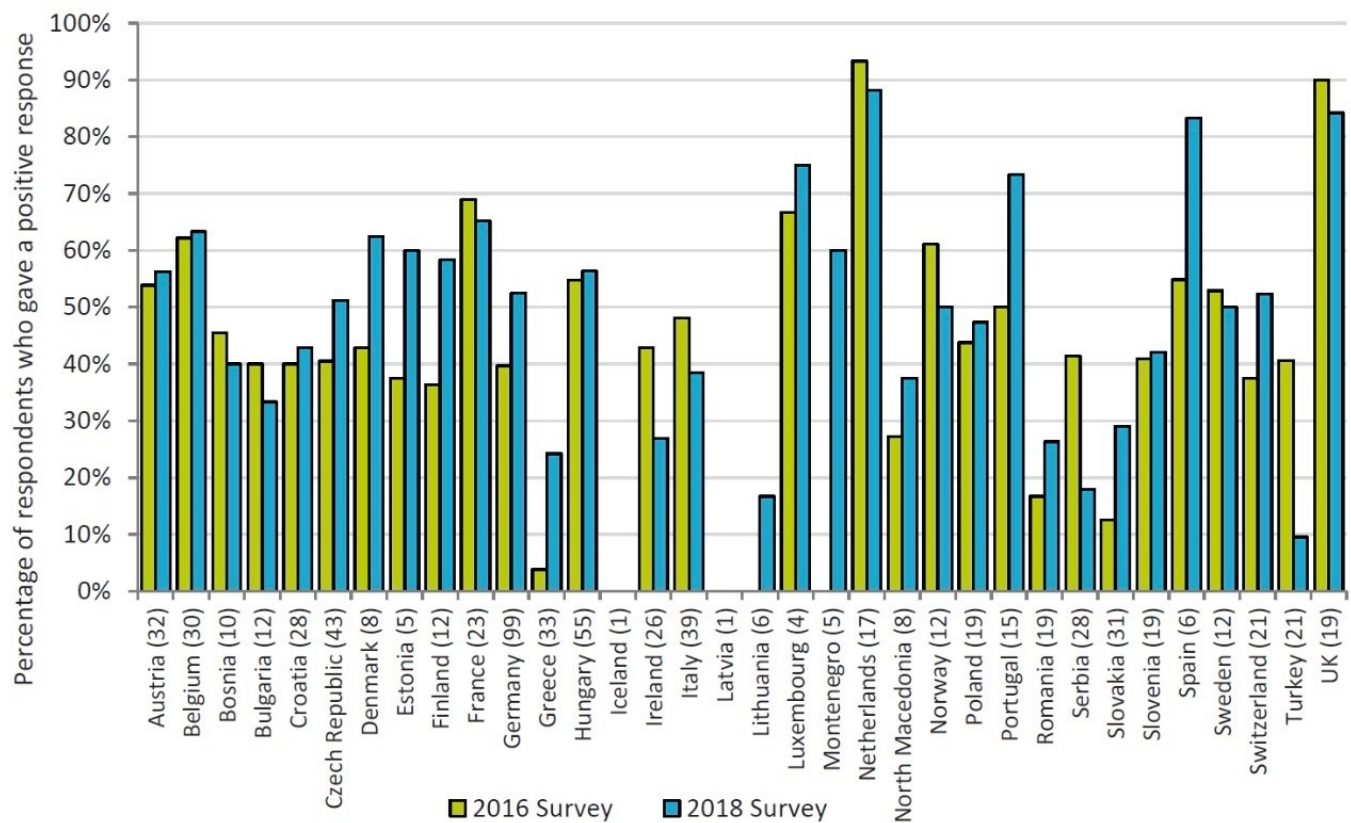

Supplement: ejhpharm-2019-002028supp005.pdf [file ejhpharm-2019-002028supp005.pdf]
