# Supplementary material
Source: PubMed Central journal article supplement (PMC8717797)

Online supplementary figure 4: Percentage of respondents who gave a positive response to the statement “The pharmacists in our hospital work routinely as part of a multidisciplinary team?”

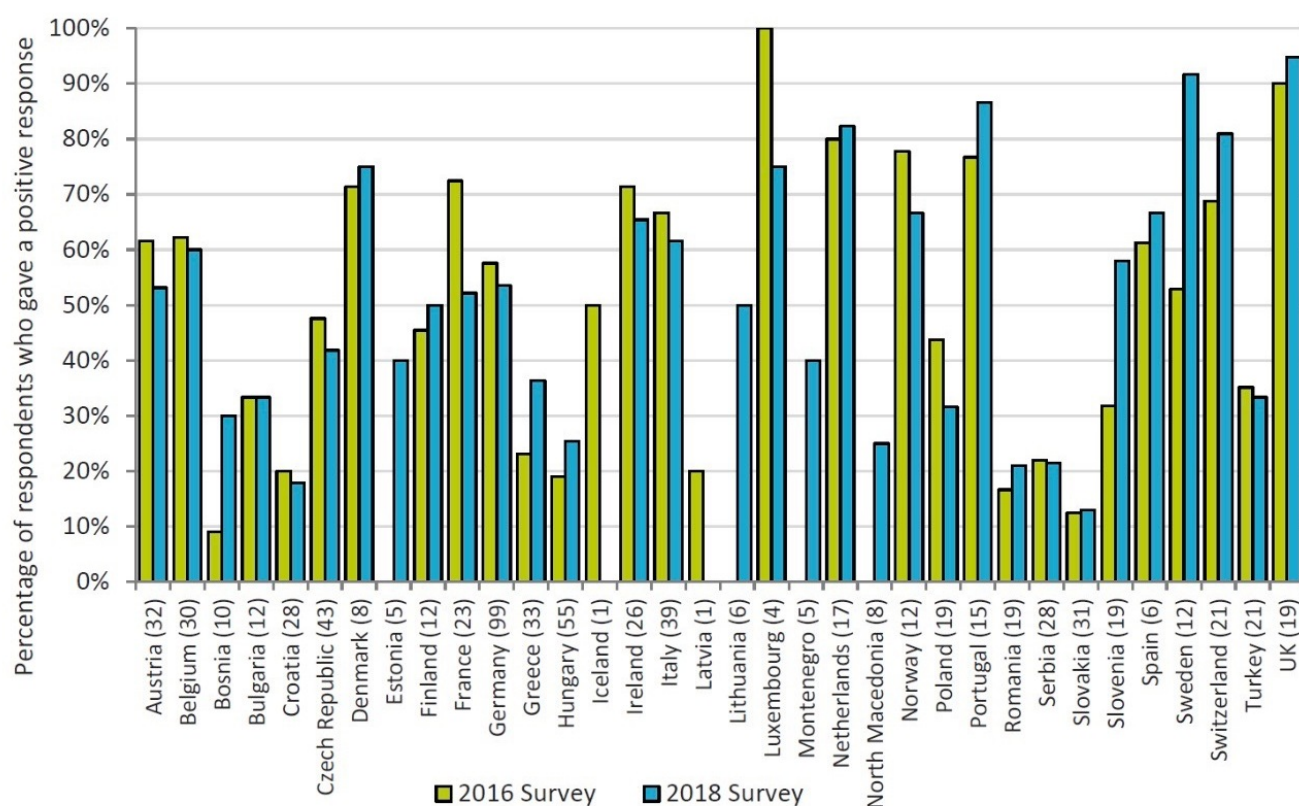

Supplement: ejhpharm-2019-002028supp006.pdf [file ejhpharm-2019-002028supp006.pdf]
