# Supplementary material
Source: PubMed Central journal article supplement (PMC8717797)

## Online supplementary figure 5:

Percentage of respondents who gave a positive response to the statement “All prescriptions in our hospital are reviewed and validated as soon as possible by a pharmacist”.

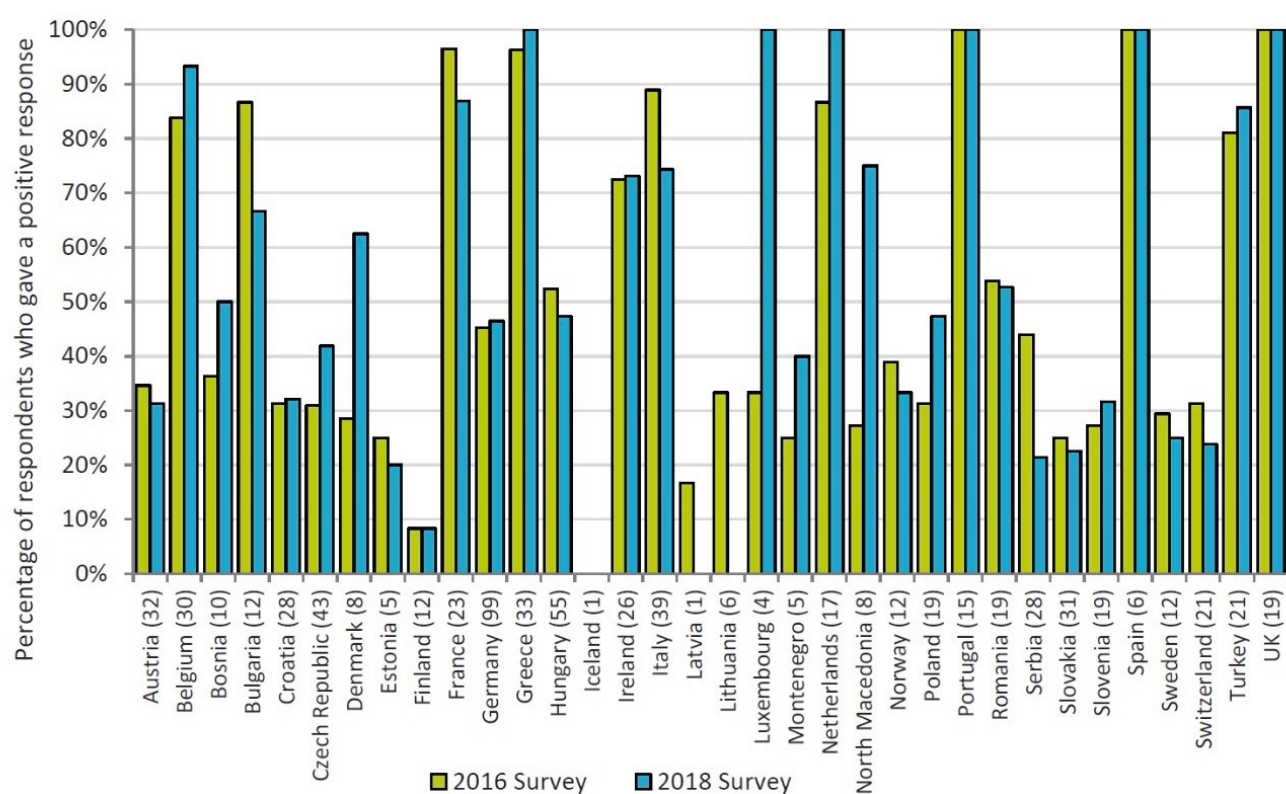

Supplement: ejhpharm-2019-002028supp007.pdf [file ejhpharm-2019-002028supp007.pdf]
